# Supplementary material for: A clinically translatable kit for MRI/NMI dual-modality nanoprobes based on anchoring group-mediated radiolabeling
Source: Royal Society of Chemistry journal article supplement (doi:10.1039/d2nr05988f), 2023-01-01
Supplement: d2nr05988f3.pdf [file d2nr05988f3.pdf]

## Supporting Information

### A Clinically Translatable Kit for MRI/NMI Dual-Modality Nanoprobe Based on Anchoring Group-Mediated Radiolabeling

Lei Chen<sup>1,#</sup>, Yun Gao<sup>1,#</sup>, Jianxian Ge<sup>1</sup>, Yi Zhou<sup>1</sup>, Zhe Yang<sup>1</sup>, Cang Li<sup>1</sup>, Baoxing Huang<sup>1</sup>, Kuan Lu<sup>1</sup>, Dandan Kou<sup>1</sup>, Dandan Zhou<sup>1</sup>, Can Chen<sup>1</sup>, Sixia Wang<sup>1</sup>, Shuwang Wu<sup>1</sup>, Jianfeng Zeng<sup>1,\*</sup>, Gang Huang<sup>2</sup>, and Mingyuan Gao<sup>1,2,3,\*</sup>

<sup>1</sup>Center for Molecular Imaging and Nuclear Medicine, State Key Laboratory of Radiation Medicine and Protection, School for Radiological and Interdisciplinary Sciences (RAD-X), Soochow University, Collaborative Innovation Center of Radiological Medicine of Jiangsu Higher Education Institutions, Suzhou 215123, China

<sup>2</sup>Shanghai Key Laboratory of Molecular Imaging, Shanghai University of Medicine and Health Sciences, Shanghai 201318, China

<sup>3</sup>The Second Affiliated Hospital of Soochow University, Suzhou 215004, China

E-mail: jfzeng@suda.edu.cn; gaomy@suda.edu.cn

### Supplementary Results

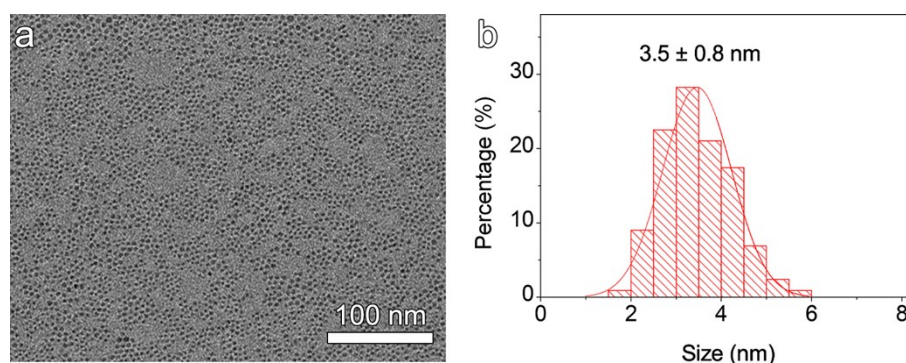

Figure S1. TEM image (a) and the corresponding size histogram (b) of the as-prepared hydrophobic Fe<sub>3</sub>O<sub>4</sub> nanocrystals.

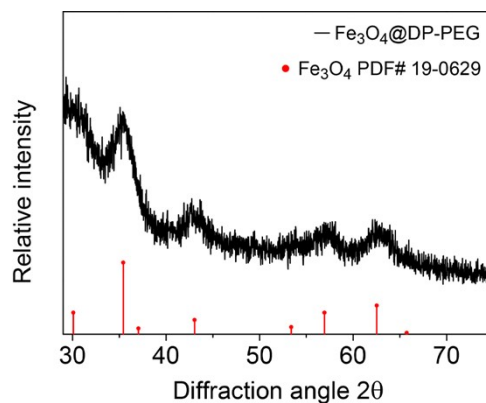

Figure S2. X-ray diffraction pattern of hydrophobic  $\text{Fe}_3\text{O}_4$  nanoparticles together with the line pattern for magnetite according to the JCPDS card (19-0629).

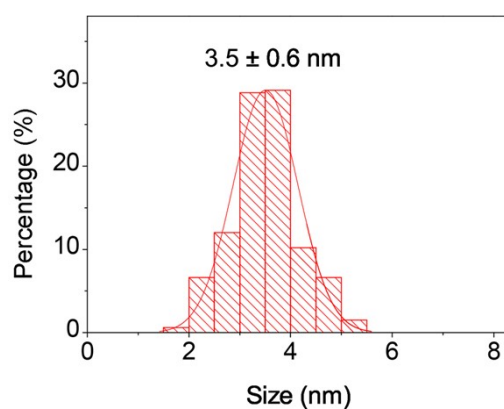

Figure S3. Size histogram of  $\text{Fe}_3\text{O}_4$ @DP-PEG nanocrystals.

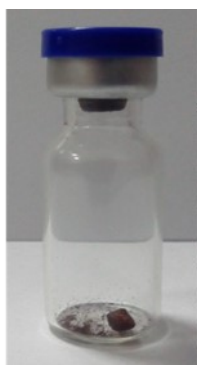

Figure S4.  $\text{Fe}_3\text{O}_4$  nanoparticle-based radiolabeling kit.

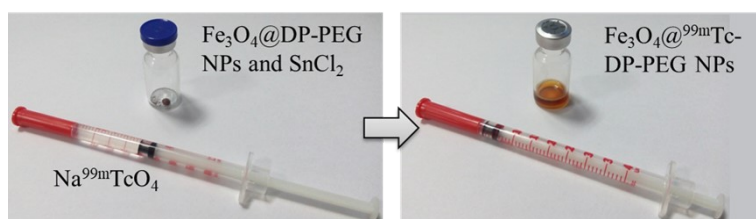

Figure S5. Steps for preparing NM/MR dual-modality probes using the radiolabeling kit.
